# Supplementary material for: A bacterial type III secretion-based protein delivery tool for broad applications in cell biology
Source: PubMed Central journal article supplement — J Cell Biol. 2015 Nov 23;211(4):913–31. doi: 10.1083/jcb.201502074 (PMC4657163; doi:10.1083/jcb.201502074), 2015-11-23
Supplement: supp_jcb.201502074_JCB_201502074_sm.pdf [file supp_jcb.201502074_JCB_201502074_sm.pdf]

Ittig et al., <http://www.jcb.org/cgi/content/full/jcb.201502074/DC1>

a

| Bacterial strain                                                           | Relevant characteristics                                                                                                                                                                                                                                                                          | Reference                     | Biosafety level |
|----------------------------------------------------------------------------|---------------------------------------------------------------------------------------------------------------------------------------------------------------------------------------------------------------------------------------------------------------------------------------------------|-------------------------------|-----------------|
| <i>Yersinia enterocolitica</i><br>$\Delta yopH, O, P, E, M, T$             | MRS40 pIML421<br>[ <i>yopH</i> <sub><math>\Delta 1-352</math></sub> , <i>yopO</i> <sub><math>\Delta 65-558</math></sub> , <i>yopP</i> <sub>23</sub> ,<br><i>yopE</i> <sub>21</sub> , <i>yopM</i> <sub>23</sub> , <i>yopT</i> <sub>135</sub> ]                                                     | Iriarte and Cornelis,<br>1998 | 2               |
| <i>Yersinia enterocolitica</i><br>$\Delta yopH, O, P, E, M, T \Delta asd$  | MRS40 <i>asd</i> <sub><math>\Delta 292-610</math></sub> , pIML421<br>[ <i>yopH</i> <sub><math>\Delta 1-352</math></sub> , <i>yopO</i> <sub><math>\Delta 65-558</math></sub> , <i>yopP</i> <sub>23</sub> ,<br><i>yopE</i> <sub>21</sub> , <i>yopM</i> <sub>23</sub> , <i>yopT</i> <sub>135</sub> ] | Kudryashev et al., 2013       | 1               |
| <i>Yersinia enterocolitica</i><br>$\Delta yopH, O, P, E, M, T \Delta yopB$ | MRS40 pIML421 [ <i>yopB</i> <sub><math>\Delta 89-217</math></sub> ,<br><i>yopH</i> <sub><math>\Delta 1-352</math></sub> , <i>yopO</i> <sub><math>\Delta 65-558</math></sub> , <i>yopP</i> <sub>23</sub> ,<br><i>yopE</i> <sub>21</sub> , <i>yopM</i> <sub>23</sub> , <i>yopT</i> <sub>135</sub> ] | unpublished data              | 2               |

b

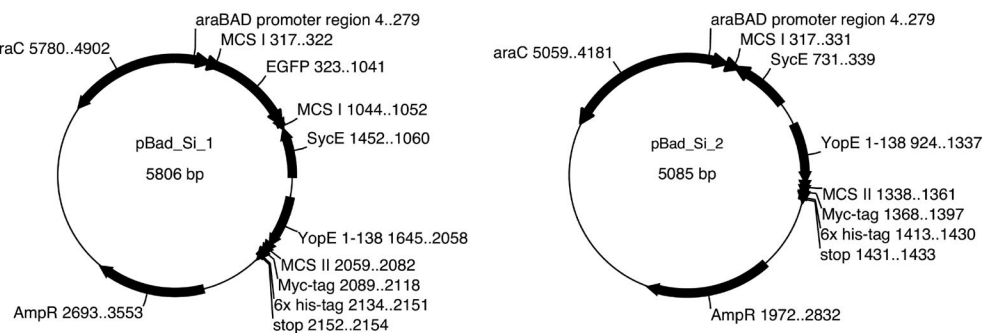

c

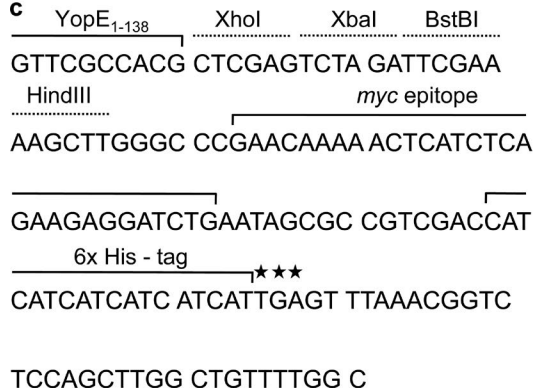

Figure S1. **Description of the T3S-based delivery toolbox.** (a) Description of the *Y. enterocolitica* strains used in this study. (b) Vector maps of the cloning plasmids used to generate the YopE<sub>1-138</sub> fusion constructs. The chaperone SycE and the YopE<sub>1-138</sub> fusion are under the native *Y. enterocolitica* promoter. The two plasmids differ only in the presence of an arabinose-inducible EGFP. (c) Sequence of the multiple cloning site located directly after the YopE<sub>1-138</sub> fragment.

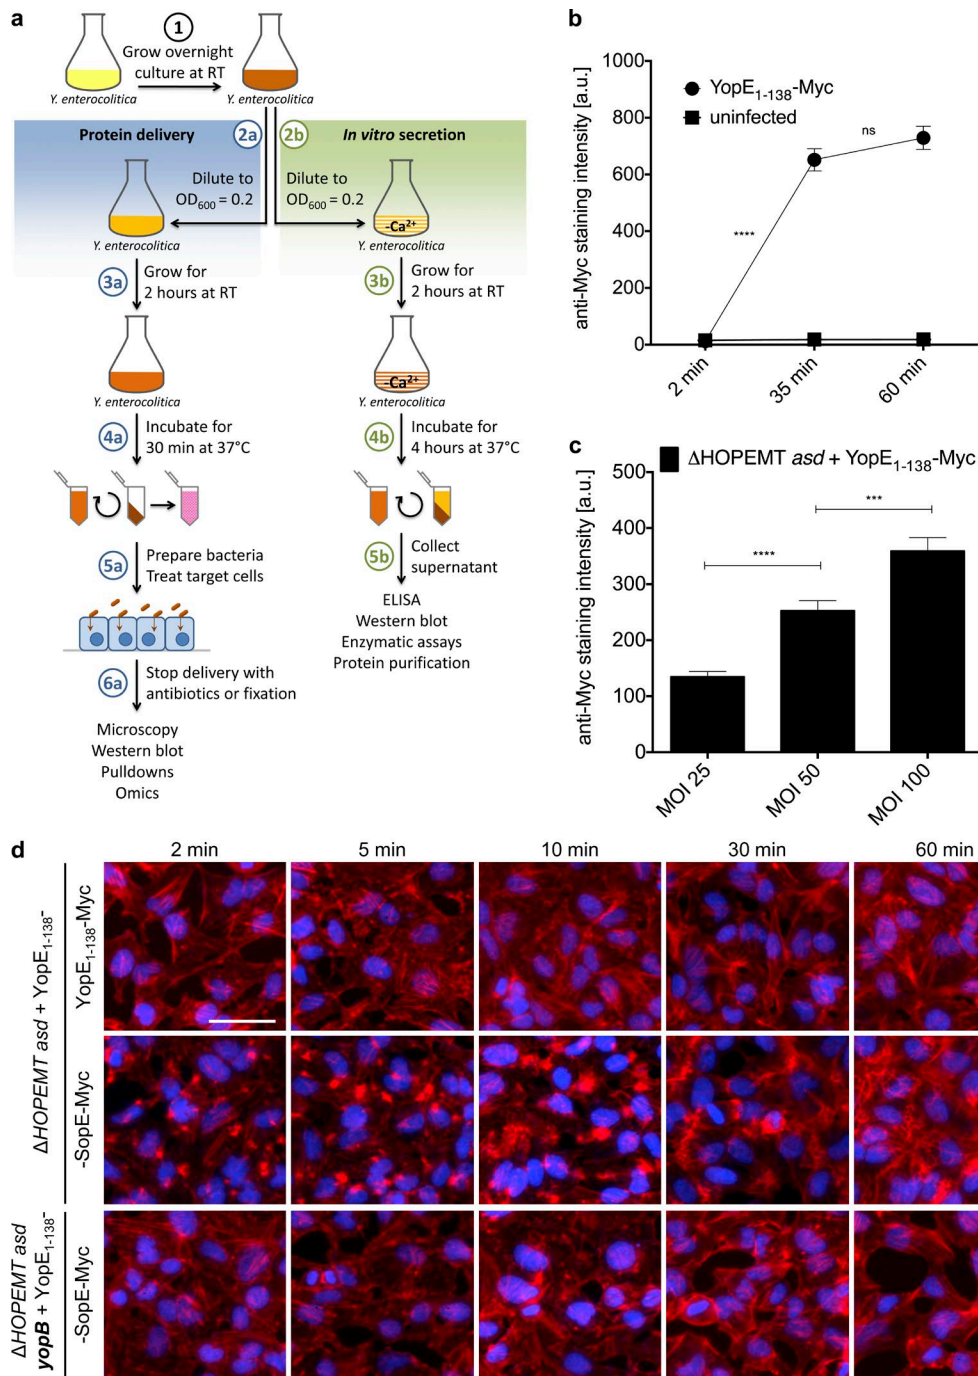

Figure S2. **Protocol and kinetics the T3S-based delivery toolbox.** (a) Schematic representation of the standard secretion and infection procedure. (b) Quantification of anti-Myc immunofluorescence staining intensity within HeLa cells as shown in Fig. 1 C. Data correspond to the mean of  $n = 60$  cells per condition, and error bars indicate standard errors of the mean. Statistical analysis was performed using a Mann-Whitney test (\*\*\*\*,  $P < 0.0001$ ; ns, not significant). (c) Quantification of anti-Myc immunofluorescence staining intensity within HeLa cells as shown in Fig. 1 D. Data correspond to the mean of  $n = 30$  cells per condition, and error bars indicate standard errors of the mean. Statistical analysis was performed using a Mann-Whitney test (\*\*\*,  $P < 0.001$ ; \*\*\*\*,  $P < 0.0001$ ). (d) Translocated SopE induces a dramatic remodelling of F-actin. HeLa cells were infected with the indicated strains at an MOI of 100 for the indicated time periods. After fixation, cells were stained for nuclei (blue) and F-actin (red). Bar, 50  $\mu\text{m}$ .

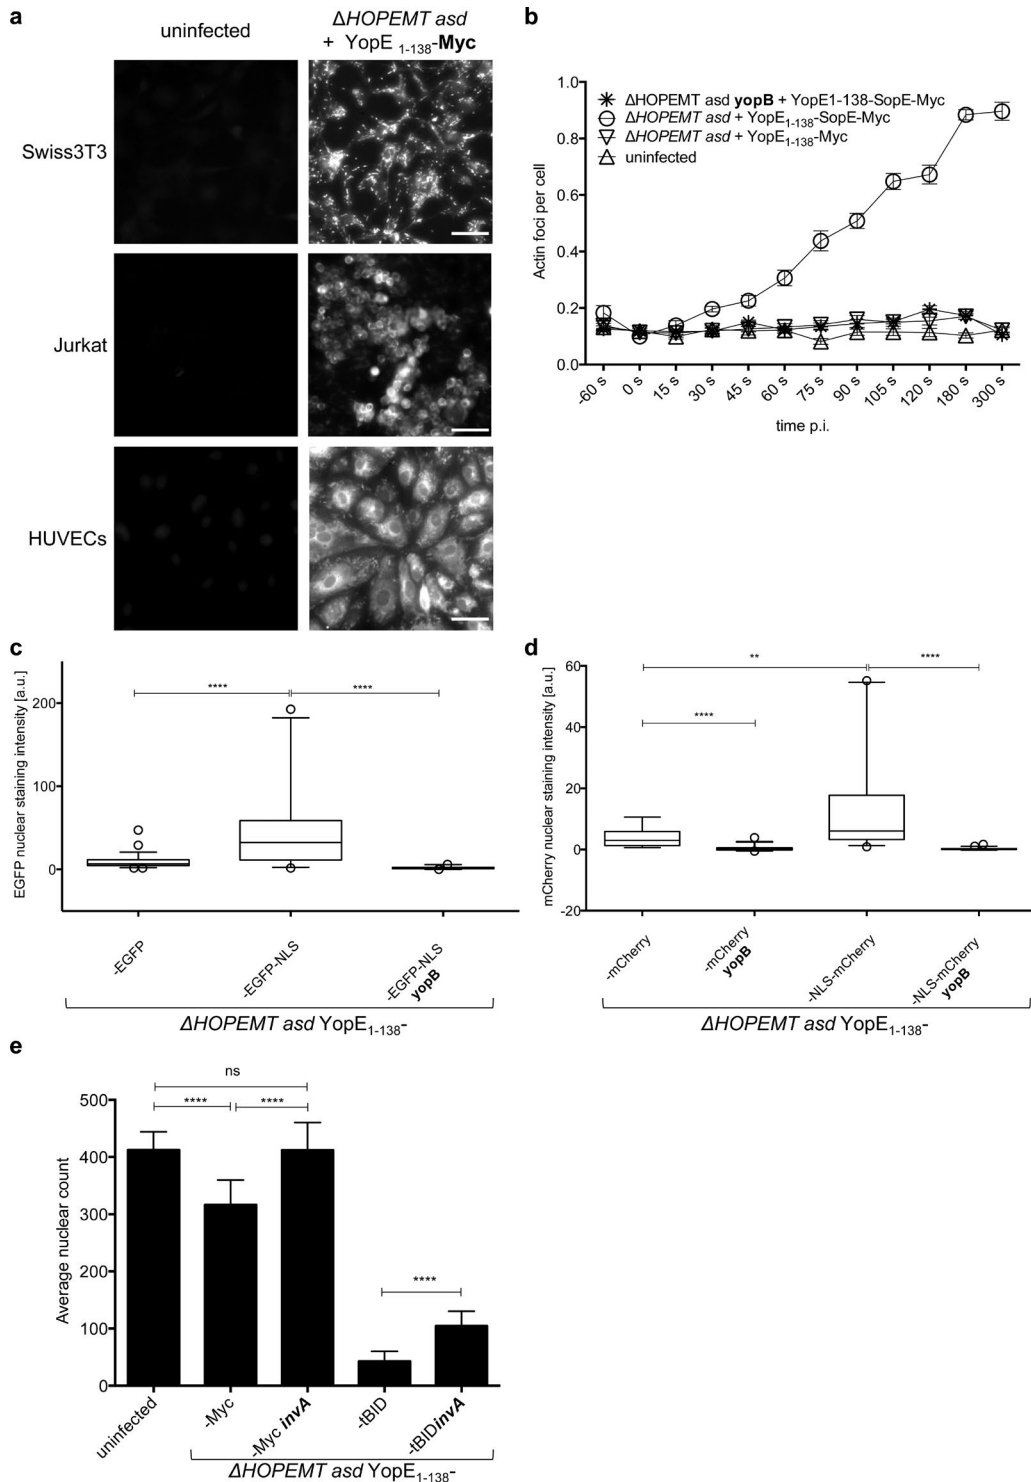

Figure S3. **Spectrum of target cells and quantifications of T3S-based delivery.** (a) T3S-based protein delivery into various cell lines and primary cells. Anti-Myc immunofluorescence staining of Swiss 3T3 fibroblasts, Jurkat, and human umbilical vein cells infected or not for 1 h at MOIs 200, 25, and 400, respectively, with the strain delivering YopE<sub>1-138</sub>-Myc. Bars, 50  $\mu$ m. (b) Automated quantification of actin foci per cell in images as in Fig. 2 C. Automated image analysis was performed on  $n = 18$  images per condition and time point. Error bars indicate standard errors of the mean. (c and d) Quantification of EGFP or mCherry fluorescence intensity, respectively, in the nuclei of images as in Fig. 5 (A or B). A 5–95%ile boxplot is shown. Statistical analysis was performed using a Mann-Whitney test (\*\*,  $P < 0.01$ ; \*\*\*\*,  $P < 0.0001$ ). (e) Delivery of tBID by *invA* strain leads to a strong reduction in cell number, assessed by counting of nuclei. HeLa cells were infected for 60 min with the indicated strains at an MOI of 100. Automated image analysis was performed on  $n = 27$  images per condition. Error bars indicate standard errors of the mean. Statistical analysis was performed using a Mann-Whitney test (\*\*\*\*,  $P < 0.0001$ ; ns, not significant).

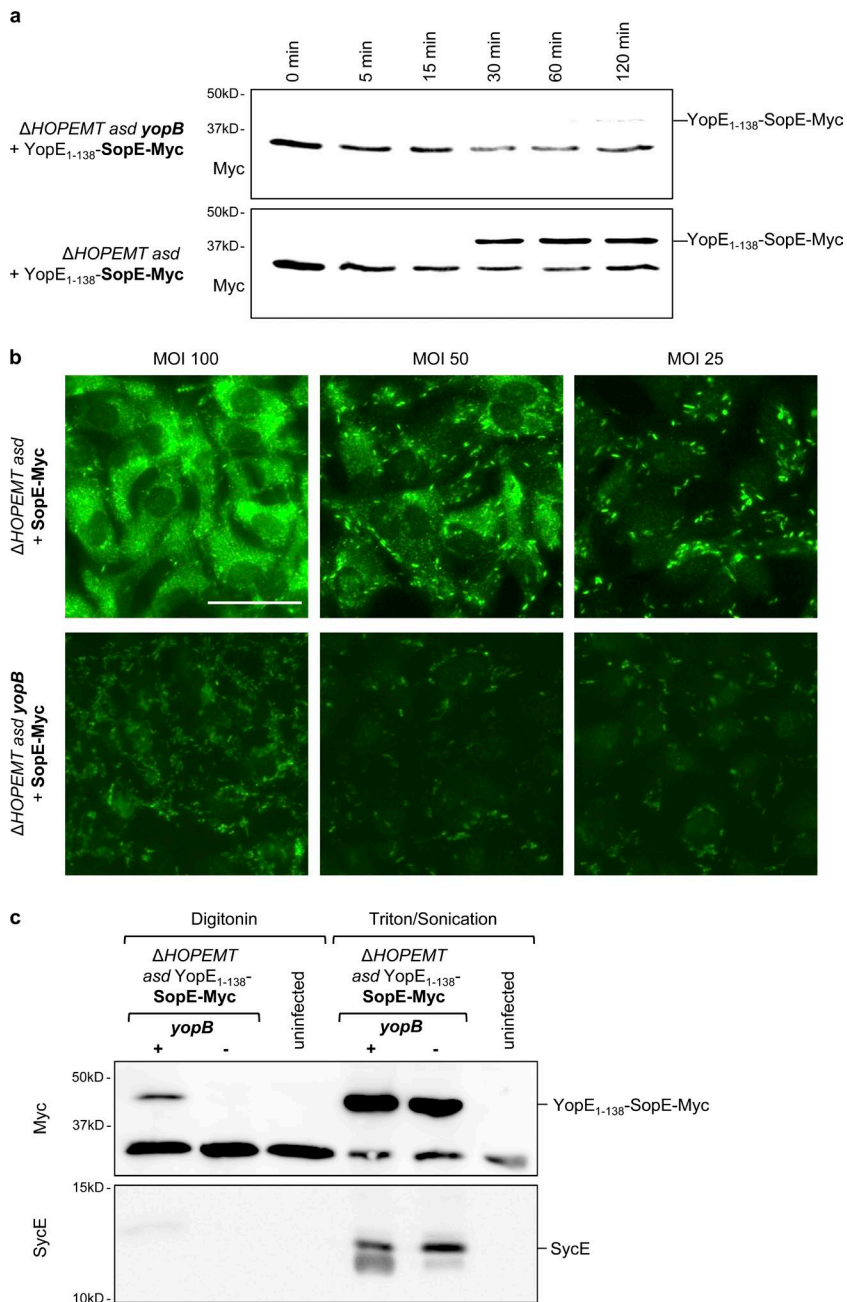

Figure S4. **T3S-dependent delivery of bacterial effectors into eukaryotic cells.** (a) Digitonin-lysed HeLa cells infected at MOI 100 for indicated time periods with  $\Delta HOPEMT$  *asd* or  $\Delta HOPEMT$  *asd*  $\Delta yopB$  strains expressing YopE<sub>1-138</sub>-SopE-Myc were analyzed by Western blot with an anti-Myc antibody. (b) Anti-Myc immunofluorescence staining on HeLa cells infected with the indicated strains at different MOIs for 1 h. Gentamicin was added 30 min p.i. The anti-Myc staining is shown in green. Bar, 50  $\mu$ m. (c) HeLa cells infected at MOI 100 for 1 h with  $\Delta HOPEMT$  *asd* or  $\Delta HOPEMT$  *asd*  $\Delta yopB$  strains expressing YopE<sub>1-138</sub>-SopE-Myc were lysed with digitonin or by a combination of Triton and sonication and were analyzed by Western blot with an anti-Myc or an antibody against the bacteria cytosolic chaperone SycE (anti-SycE).

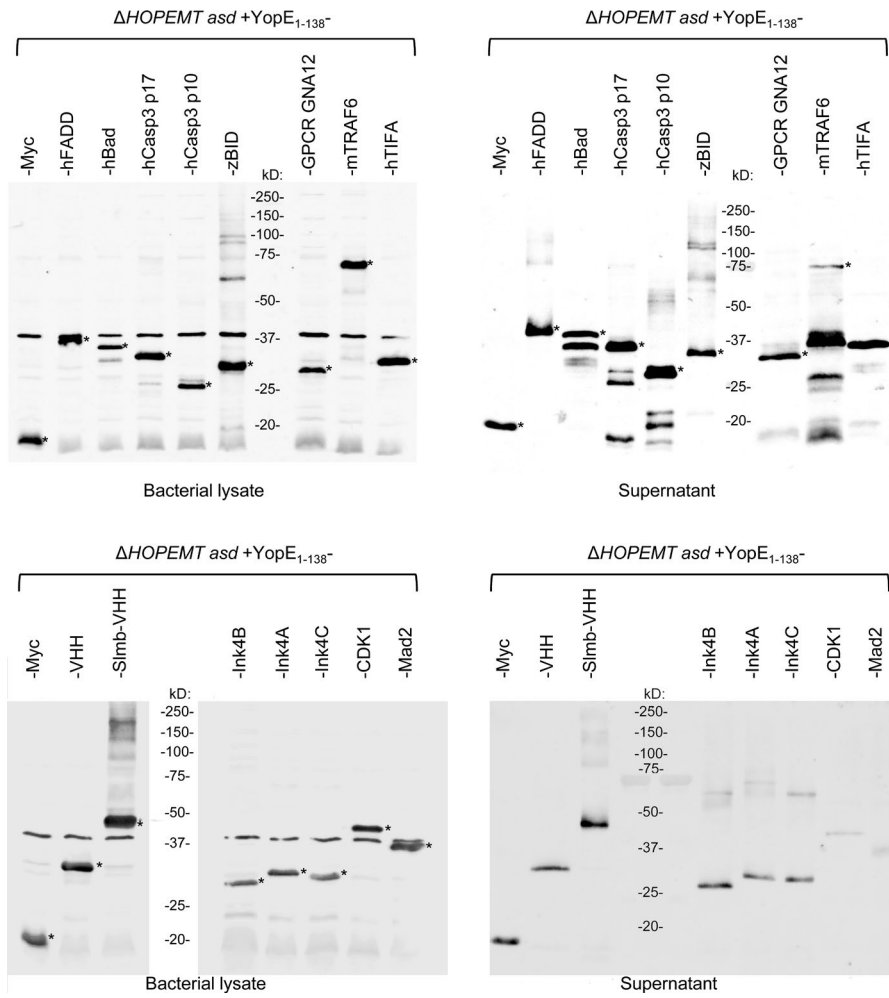

Figure S5. **T35-dependent secretion of eukaryotic proteins.** In vitro secretion of indicated strains revealed by Western blot analysis using an anti-YopE antibody. As a control for protein expression, bacterial lysates of corresponding strains are shown. Asterisks mark the proteins of interest.

Table S1. **Known and predicted caspase-3 substrates from the tBID phosphoproteome**

| <b>Protein</b> | <b>Caspase-3 substrate status<sup>a</sup></b> |
|----------------|-----------------------------------------------|
| SPTB2          | known                                         |
| PAK2           | known                                         |
| TAOK1          | known                                         |
| ACINU          | known                                         |
| DBNL           | known                                         |
| IF4H           | known                                         |
| IF4G1          | known                                         |
| IF4B           | known                                         |
| HS90B          | known                                         |
| ICAL           | known                                         |
| NUMA1          | known                                         |
| PARG           | known                                         |
| PERQ2          | predicted                                     |
| CTND1          | predicted                                     |
| DOCK9          | predicted                                     |
| AHNK           | predicted                                     |
| AMPD2          | predicted                                     |
| TB182          | predicted                                     |
| SMG1           | predicted                                     |
| MYO9B          | predicted                                     |
| MYO1E          | predicted                                     |
| PKHG3          | predicted                                     |
| E41L1          | predicted                                     |
| TRRAP          | predicted                                     |
| ACINU          | predicted                                     |
| LIMC1          | predicted                                     |
| DOK1           | predicted                                     |
| DOCK1          | predicted                                     |
| NOP14          | predicted                                     |
| SPTN2          | predicted                                     |
| AKA12          | predicted                                     |
| CP131          | predicted                                     |
| SYMPK          | predicted                                     |
| CIRBP          | predicted                                     |
| MYCB2          | predicted                                     |
| FA21A          | predicted                                     |
| LS14A          | predicted                                     |
| M3K2           | predicted                                     |
| GCFC2          | predicted                                     |
| P2R3A          | predicted                                     |
| PEAK1          | predicted                                     |
| GAB2           | predicted                                     |
| PAIRB          | predicted                                     |
| INF2           | predicted                                     |
| SPAG1          | predicted                                     |
| NFAC4          | predicted                                     |
| ARHGA          | predicted                                     |
| RSF1           | predicted                                     |
| JIP4           | predicted                                     |
| IQGA2          | predicted                                     |
| ACACA          | predicted                                     |
| NGAP           | predicted                                     |
| NCOA7          | predicted                                     |
| CUX1           | predicted                                     |
| NAV1           | predicted                                     |
| CIC            | predicted                                     |
| PKP4           | predicted                                     |
| EF2K           | predicted                                     |
| GAPD1          | predicted                                     |
| PDE3A          | predicted                                     |

Table S1. **Known and predicted caspase-3 substrates from the tBID phosphoproteome** (Continued)

| <b>Protein</b> | <b>Caspase-3 substrate status<sup>a</sup></b> |
|----------------|-----------------------------------------------|
| HECD1          | predicted                                     |
| OXSR1          | predicted                                     |
| PLEC           | predicted                                     |
| DVL3           | predicted                                     |
| ZFHX3          | predicted                                     |
| RBBP6          | predicted                                     |
| ZEP1           | predicted                                     |
| MEF2D          | predicted                                     |
| S11L1          | predicted                                     |
| FLNB           | predicted                                     |

<sup>a</sup>Ayyash et al., 2012.

Table S2. List of primers used in this study

| Primer No.: Si_ | Sequence (5'-3')                                       |
|-----------------|--------------------------------------------------------|
| 285             | CATACCATGGGAGTGAGCAAGGGCGAG                            |
| 286             | GGAAGATCTTTACTTGTACAGCTCGTCCAT                         |
| 287             | CGGGGTACCTCAACTAAATGACCGTGGTG                          |
| 288             | GTAAAGCTTTTCGAATCTAGACTCGAGCGTGGCGAACTGGTC             |
| 296             | CAGTCTCGAGACTAACATAACACTATCCACCCAG                     |
| 297             | GTTAAAGCTTTTCAGGAGGCATTCTGAAG                          |
| 306             | GTAAAGCTTGGAGGCATTCTGAAGATACTTATT                      |
| 307             | CAGTCTCGAGCAAATACAGAGCTTCTATCACTCAG                    |
| 308             | GTAAAGCTTTCAAGATGTGATTAATGAAGAAATG                     |
| 317             | CAGTTTCGAACCCATAAAAAAGCCCTGTC                          |
| 318             | GTAAAGCTTCTACTCTATCATCAAACGATAAAATGG                   |
| 324             | CAGTCTCGAGTTCCTCAAGAAACGCAAA                           |
| 341             | CGTATCTAGAAAAATGATGAAAATGGAGACTG                       |
| 342             | GTTAAAGCTTTTAGCTGGAGACGGTGAC                           |
| 346             | CAGTCTCGAGTTCAGATCCCAGAGTTTG                           |
| 347             | GTTAAAGCTTTCACTGGGAGGGGG                               |
| 351             | CAGTCTCGAGCTCGAGTTATCTACTCATAGAACTACTTTTGCAG           |
| 352             | CGCGGATCCTCAGTGTCTCTGCGGCATTA                          |
| 353             | CATTTATTCTCCTAGTTAGTACAGCAACTGCTGCTCCTTTC              |
| 354             | GAAAGGAGCAGCAGTTGCTGTGACTAACTAGGAGGAATAAATG            |
| 355             | CGATTCACGGATTGCTTTCTATTATCCCTCCAGGTAATA                |
| 356             | TAGTACCTGGAGGAATAATGAGAAAGCAATCCGTGAATCG               |
| 357             | CGTATCTAGACGGCTTTAAGTGCGACATTC                         |
| 364             | CGTATCTAGACTAAAGTATGAGGAGAGAAAATTGAA                   |
| 365             | GTTAAAGCTTTCACTTGGCGTCGT                               |
| 367             | CGTATCTAGAGACCCGTTCTGGTGTC                             |
| 369             | CGTATCTAGACCCCAAGAAAGAACG                              |
| 373             | GTTAAAGCTTGTGGAGACGGTGACC                              |
| 386             | CGTATCTAGATCAGGACGCTTCGGAGGTAG                         |
| 387             | CGTATCTAGAATGGACTGTGAGGTCAACAA                         |
| 389             | CGTATCTAGAGGCAACCGCAGCA                                |
| 391             | GTTAAAGCTTTCACTCCATCCCATTCTG                           |
| 403             | CGTATCTAGATCTGGAATATCCCTGGACA                          |
| 406             | GTTAAAGCTTGTCTGTCTCAATGCCACAGT                         |
| 410             | CAGTCTCGAGATGTCCGGGTGGTG                               |
| 413             | CAGTTTCGAATCACTGAGCATGATGTC                            |
| 417             | CAGTCTCGAGAGTGGTGTGATGATGACATG                         |
| 420             | CAGTTTCGAATTAGTGATAAAAATAGAGTTCTTTTGTGAG               |
| 425             | GTAAAGCTTTTACACCTTGGCTTCTTCTGGGGGGCTGGAGACGGTGAC       |
| 428             | CGTATCTAGAATGGACTTCAACAGGAACTTT                        |
| 429             | CGTATCTAGAGGACATAGTCCACCAGCG                           |
| 430             | GTTAAAGCTTTCACTTGGATCCGAAAAAC                          |
| 433             | CGTATCTAGAGAATTAATAAAAAACTCATCCCA                      |
| 434             | CGTATCTAGACCAAAGGCAAAAGCAAAAA                          |
| 435             | GTTAAAGCTTTTAGCTAGCCATGGCAAGC                          |
| 436             | CGTATCTAGAATGCCCCGCC                                   |
| 437             | GTTAAAGCTTCTACCCACCGTACTCGTCAAT                        |
| 438             | CGTATCTAGAATGTCTGACACGTCCAGAGAG                        |
| 439             | GTTAAAGCTTTTCACTTCTTCCAGGAAAAAG                        |
| 445             | CGCGGATCCTTATGGGTTCTCACAGCAAAA                         |
| 446             | CATTTATTCTCCTAGTTAGTCAAGGCAACAGCCAATCAAGAG             |
| 447             | CTCTTGATTGGCTGTTGCCCTTACTAACTAGGAGGAATAAATG            |
| 448             | TTGATTGCAAGTACATGGTGATTATCCCTCCAGGTAATA                |
| 449             | TAGTACCTGGAGGAATAATGCACCATGTCACTGCAATCAA               |
| 450             | CGTATCTAGATAGCCGAGATGTTGGTATG                          |
| 451             | CGTATCTAGAGATCAAGTCCAACCTGGTGG                         |
| 452             | CGTATCTAGAGCTAGCCCTAGGCGTACGACTAGTGATCAAGTCCAACCTGGTGG |
| 453             | CCTAGCTAGCATGGTGGCAAGGGCG                              |
| 454             | CATGACTAGTCTGTACAGCTCGTCCATGC                          |
| 463             | CAGTCTCGAGGAAAGCTTGTAAAGGGC                            |
| 464             | CAGTTTCGAATTAGCGACGGCGACG                              |



Table S2. List of primers used in this study (Continued)

| Primer No.: Si_ | Sequence (5'-3')                                                                             |
|-----------------|----------------------------------------------------------------------------------------------|
| 476             | GTAAAGCTTTTACTTGTACAGCTCGTCCAT                                                               |
| 477             | CGTATCTAGAGTGAGCAAGGGCGAG                                                                    |
| 478             | CAGTCTCGAGATGGAAGATTATACAAAATAGAGAAA                                                         |
| 479             | GTAAAGCTTCTACATCTTCTTAATCTGATTGTCCA                                                          |
| 482             | CGTATCTAGAATGGCGCTGCAGCT                                                                     |
| 483             | GTAAAGCTTTCAGTCATTGACAGGAATTTTG                                                              |
| 486             | CGTATCTAGAATGGAGCCGGCGGCG                                                                    |
| 487             | GTAAAGCTTTCATCGGGGATGTCTG                                                                    |
| 492             | CGTATCTAGAATGCCGAGGAGAACAAGGG                                                                |
| 493             | GTAAAGCTTTCAGTCCCCTGTGGCTGTCC                                                                |
| 494             | CGTATCTAGAATGGCCGAGCCTTG                                                                     |
| 495             | GTAAAGCTTTTATTGAAGATTGTGGCTCC                                                                |
| 504             | CGTATCTAGAGAAAATCTGTATTTTCAAAGTGAAAATCTGTATTTTCAAAGTATGCCCCGCC                               |
| 505             | GTAAAGCTTCCCACCGTACTCGTCAATTC                                                                |
| 508             | CGTATCTAGAGAAAATCTGTATTTTCAAAGTGAAAATCTGTATTTTCAAAGTATGCCCCGAGCCTTG                          |
| 509             | GTAAAGCTTTTGAAGATTGTGGCTCCC                                                                  |
| 511             | CGTATCTAGAGAAAATCTGTATTTTCAAAGTGAAAATCTGTATTTTCAAAGTGTGAGCAAGGGCGAG                          |
| 512             | CGTATCTAGAGAAAATCTGTATTTTCAAAGTGAAAATCTGTATTTTCAAAGTCCGCCGAAAAAACAAGTGTGAGCAAGGGCGAG         |
| 513             | GTAAAGCTTTTAACTTTACGTTTTTTTTTCGGCGCTGTACAGCTCGTCCAT                                          |
| 515             | CGTATCTAGAGAAAATCTGTATTTTCAAAGTGAAAATCTGTATTTTCAAAGTGATTATAAAGATGATGATGATAAAAATGCCCCGAGCCTTG |
| 558             | CGTATCTAGAATGACCAGTTTTGAAGATGC                                                               |
| 559             | GTAAAGCTTTCATGACTCATTTTCATCCAT                                                               |
| 561             | CGTATCTAGAATGAGTCTTAAACTGTGAGAACAG                                                           |
| 562             | GTAAAGCTTCTACCCCCGCATCA                                                                      |
| 585             | CAGTCTCGAGATGCAGATCTTCGTCAAGAC                                                               |
| 586             | GTAAAGCTTGTAGCTTCGAAACCACCAGTAGACGTAAGAC                                                     |
| 588             | CAGTTTCGAAGATTATAAAGATGATGATGATAAAAATGCCCCGAGCCTTG                                           |

Three additional tables are provided online. Table S3 shows the list of strains used in the study. Table S4 shows quantification of protein phosphorylation by phosphoproteomics. Table S5 shows ontology analysis of the tBID phosphoproteome.

All source codes for computational methods are available online, including CellProfiler pipelines and the SafeQuant algorithm. CellProfiler (Version 2.1.1) pipelines for the different analyses can be found as .cppipe files (text files) in the online supplemental material. The Actin\_meshwork.cppipe file corresponds to an analysis module used to quantify the actin meshwork induced by, e.g., SopE. It is based on actin staining intensity. The Count\_nuclei\_actin\_foci.cppipe pipeline allows analysis of the number of actin foci per cell. The Count\_nuclei\_cell\_size\_nobinning.cppipe pipeline allows analysis of the number of nuclei per image as well as the size of the cells, whereas the Count\_Nuclei.cppipe pipeline simply counts nuclei per image. The Zebrafish\_INF\_PIPE.cppipe pipeline identifies bacterial spots and generates around each bacterial spot a circle with a radius of 10 pixels, where CASP3 p17 staining intensity was measured. The SafeQuant v1.0 R or v2.1 script (also available at <https://github.com/eahrne/SafeQuant/>) was used to process the Progenesis analysis results further to obtain protein relative abundances.

## References

- Ayyash, M., H. Tamimi, and Y. Ashhab. 2012. Developing a powerful in silico tool for the discovery of novel caspase-3 substrates: a preliminary screening of the human proteome. *BMC Bioinformatics*. 13:14. <http://dx.doi.org/10.1186/1471-2105-13-14>
- Iriarte, M., and G.R. Cornelis. 1998. YopT, a new *Yersinia* Yop effector protein, affects the cytoskeleton of host cells. *Mol. Microbiol.* 29:915–929. <http://dx.doi.org/10.1046/j.1365-2958.1998.00992.x>
- Kudryashev, M., M. Stenta, S. Schmelz, M. Amstutz, U. Wiesand, D. Castaño-Díez, M.T. Degiacomi, S. Münnich, C.K. Bleck, J. Kowal, et al. 2013. In situ structural analysis of the *Yersinia enterocolitica* injectisome. *eLife*. 2:e00792. <http://dx.doi.org/10.7554/eLife.00792>
